# Supplementary material for: Chiral, thermal-responsive hydrogels containing helical hydrophilic polyacetylene: preparation and enantio-differentiating release ability
Source: Royal Society of Chemistry journal article supplement (doi:10.1039/c8py01759j), 2019-01-01
Supplement: c8py01759j1.pdf [file c8py01759j1.pdf]

## Chiral, thermal-responsive hydrogels containing helical hydrophilic polyacetylene: preparation and enantio-differentiating release ability

Huilei Wang,<sup>ab§</sup> Xueyong Yong,<sup>ab§</sup> Huajun Huang,<sup>bc</sup> Huli Yu,<sup>b</sup> Youping Wu<sup>\*a</sup> and Jianping Deng<sup>\*b</sup>

<sup>a</sup>State Key Laboratory of Organic Inorganic Composites, College of Materials Science and Engineering, Beijing University of Chemical Technology, Beijing 100029, China

<sup>b</sup>State Key Laboratory of Chemical Resource Engineering, College of Materials Science and Engineering, Beijing University of Chemical Technology, Beijing 100029, China

<sup>c</sup>College of Materials and Textiles, Zhejiang Sci-Tech University, Hangzhou 310018, China

E-mail: wuyp@mail.buct.edu.cn (Wu) ; dengjp@mail.buct.edu.cn (Deng)

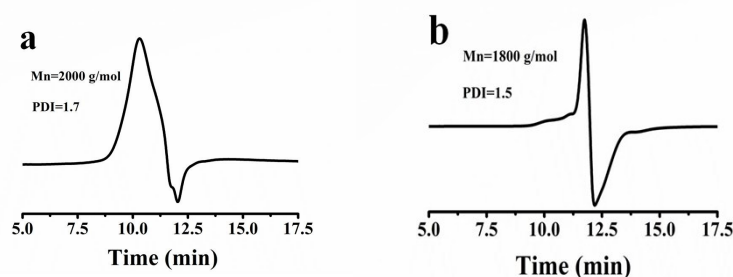

**Figure S1.** GPC traces of R-HPA and S-HPA in THF.

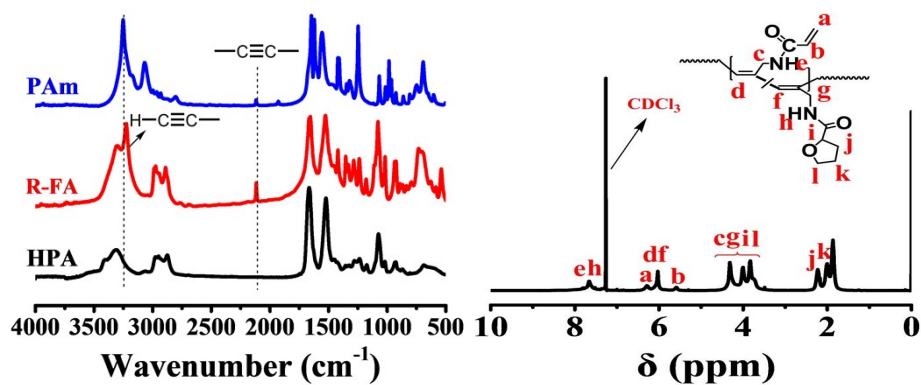

**Figure S2.** FT-IR and  $^1\text{H}$  NMR of HPA

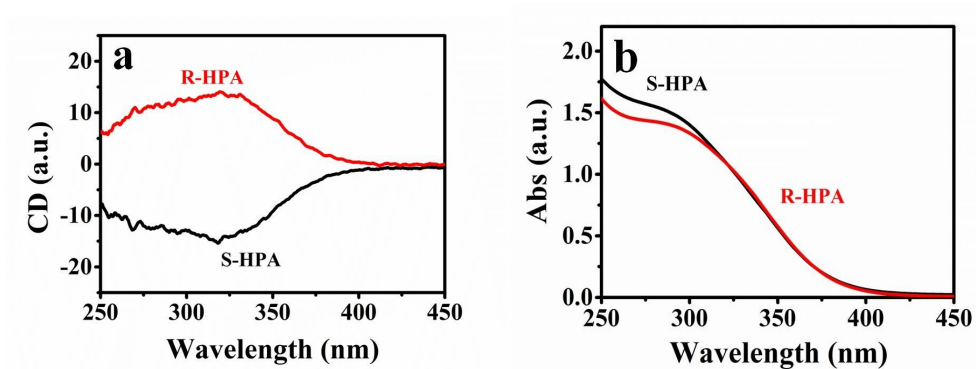

**Figure S3.** (a) CD and (b) UV-vis absorption spectra of HPA (R or S) measured in aqueous solution at a specific concentration (100 mg/L)

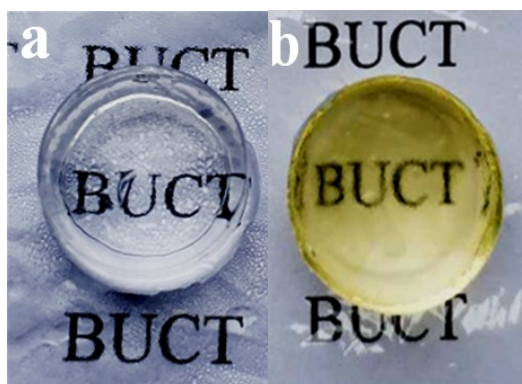

**Figure S4.** Photographs of the prepared chiral hydrogels (a) N-HGs and (b) R-HGs.

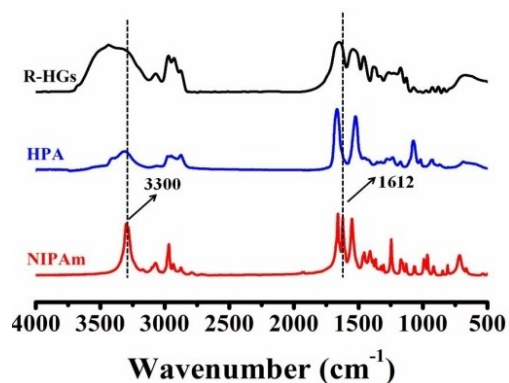

**Figure S5.** FT-IR spectra of NIPAm, HPA and and R-HGs. (KBr tablet).

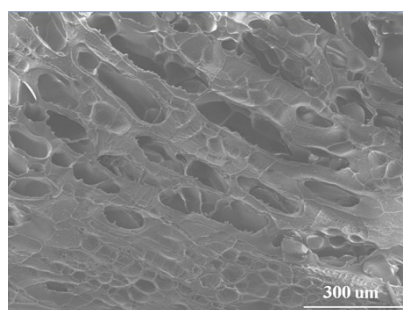

**Figure S6.** Typical SEM image of S-HGs.

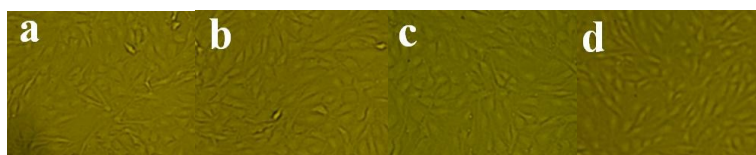

**Figure S7.** Photomicrographs of MC3T3-E1 cells cultured for 2 days in the extracts of (a) blank (b) N-HGs (c) R-HGs and (d) S-HGs.

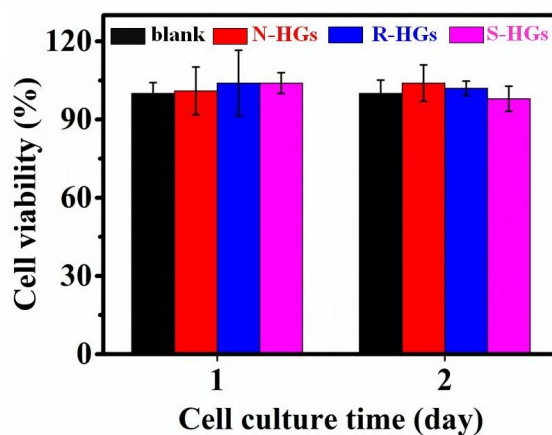

**Figure S8.** Viability of MC3T3-E1 cells for 1 and 2 days in the extracts of N-HGs, R-HGs and S-HGs, tested by using CCK-8 assay.

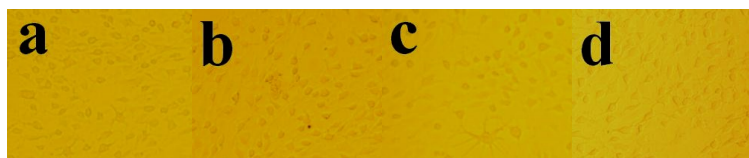

**Figure S9.** Photomicrographs of MC3T3-E1 cells cultured for 3 days using hydrogels of (a) blank (b) N-HGs, (c) R-HGs and (d) S-HGs.

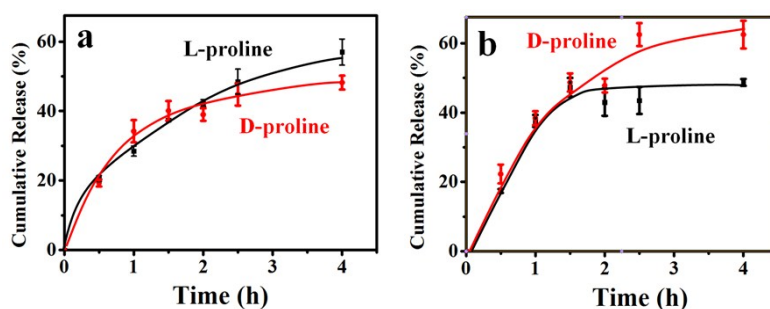

**Figure S10.** Time-release profiles of D-proline and L-proline released by (a) R-HGs and (b) S-HGs.

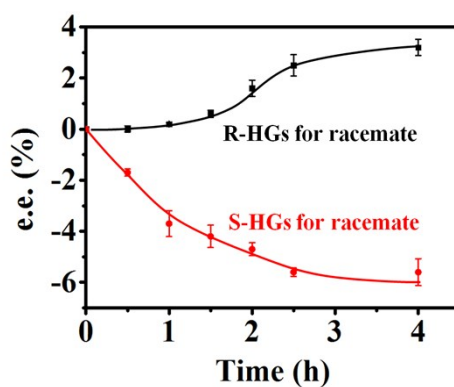

**Figure S11.** e.e.-time profiles of racemic proline released from R-HGs and S-HGs.

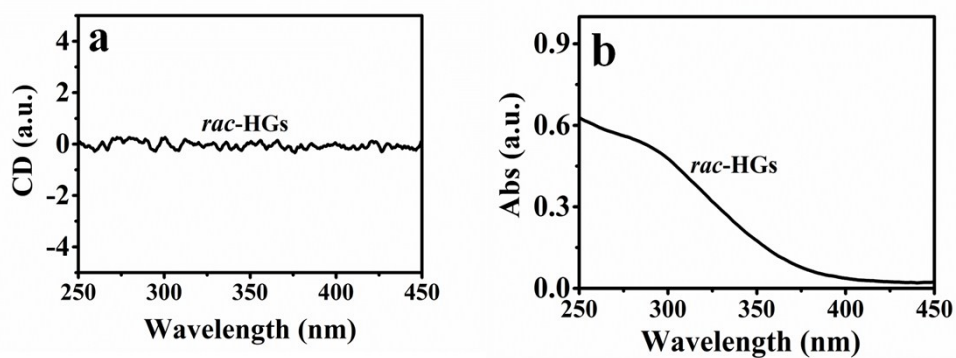

**Figure S12.** (a) CD and (b) UV-vis spectra of *rac*-HGs measured through compressing method.

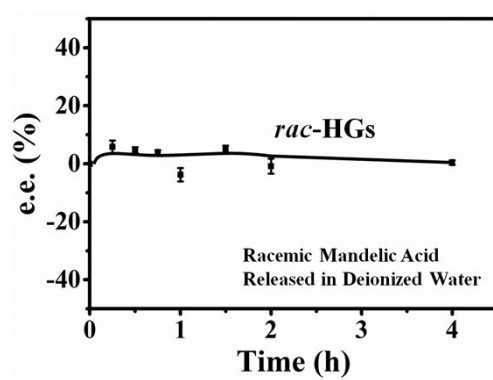

**Figure S13.** e.e.-time releasing profile of racemic mandelic acid from *rac*-HG<sub>s</sub>.
